# Supplementary material for: Enhanced electrochemical performance by a three-dimensional interconnected porous nitrogen-doped graphene/carbonized polypyrrole composite for lithium–sulfur batteries
Source: Royal Society of Chemistry journal article supplement (doi:10.1039/c6ra02667b), 2016-01-01
Supplement: c6ra02667b1.pdf [file c6ra02667b1.pdf]

## Supporting Information

# Enhanced Electrochemical Performance by Three-Dimensional Interconnected Porous Nitrogen-Doped Graphene/Carbonized Polypyrrole Composite for Lithium-Sulfur Batteries

Fei-Fei Zhang,<sup>a, b</sup> Chun-Li Wang,<sup>a, b</sup> Gang Huang,<sup>a, b</sup> Dong-Ming Yin,<sup>a, b</sup> and Li-Min Wang<sup>\*a</sup>

<sup>a</sup>State Key Laboratory of Rare Earth Resource Utilization, Changchun Institute of Applied Chemistry, Chinese Academy of Sciences, Changchun, 130022, P. R. China

<sup>b</sup>University of Chinese Academy of Sciences, Beijing, 100049, P. R. China

\*Address correspondence to [lmwang@ciac.ac.cn](mailto:lmwang@ciac.ac.cn)

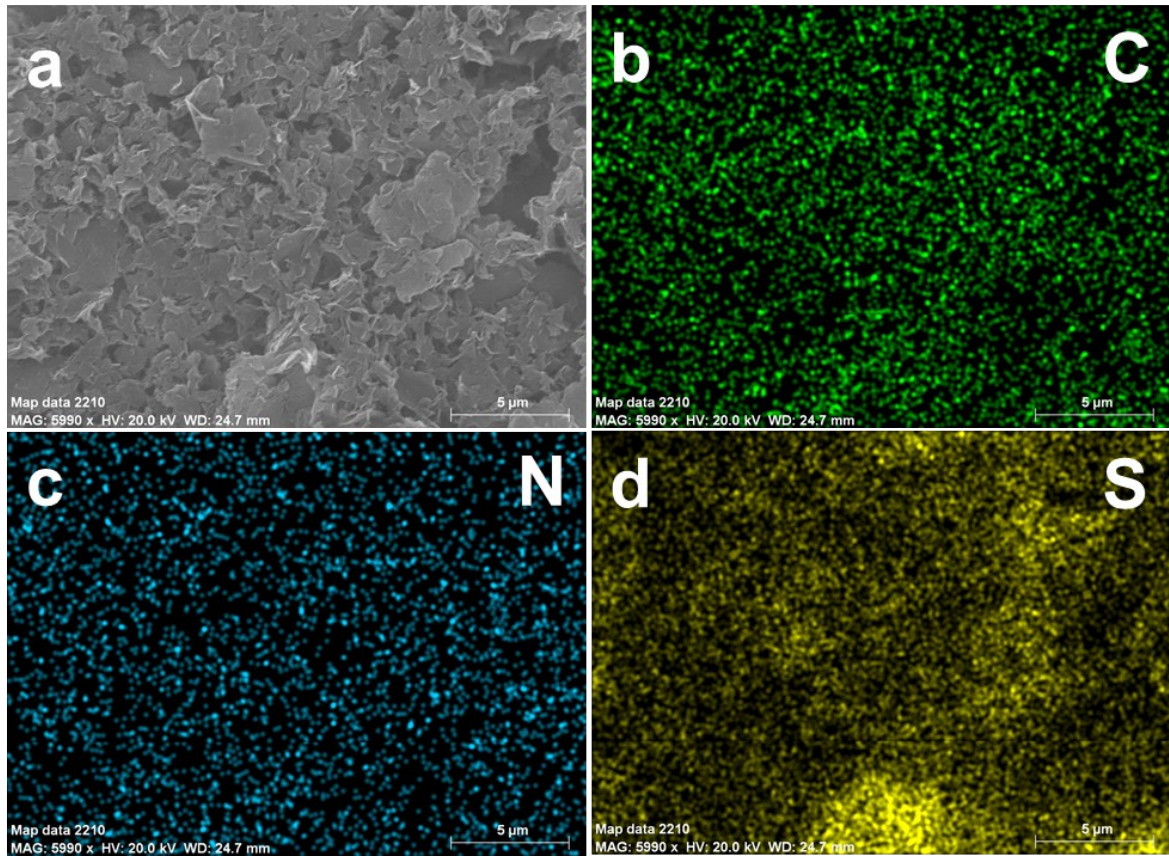

**Figure S1.** SEM images of GO/PPy-S composite and corresponding EDS elemental mapping images.
